# Supplementary material for: Experimental and theoretical investigations of benzoic acid derivatives as corrosion inhibitors for AISI 316 stainless steel in hydrochloric acid medium: DFT and Monte Carlo simulations on the Fe (110) surface
Source: Royal Society of Chemistry journal article supplement (doi:10.1039/d0ra06742c), 2020-01-01
Supplement: d0ra06742c1.pdf [file d0ra06742c1.pdf]

## Supporting information

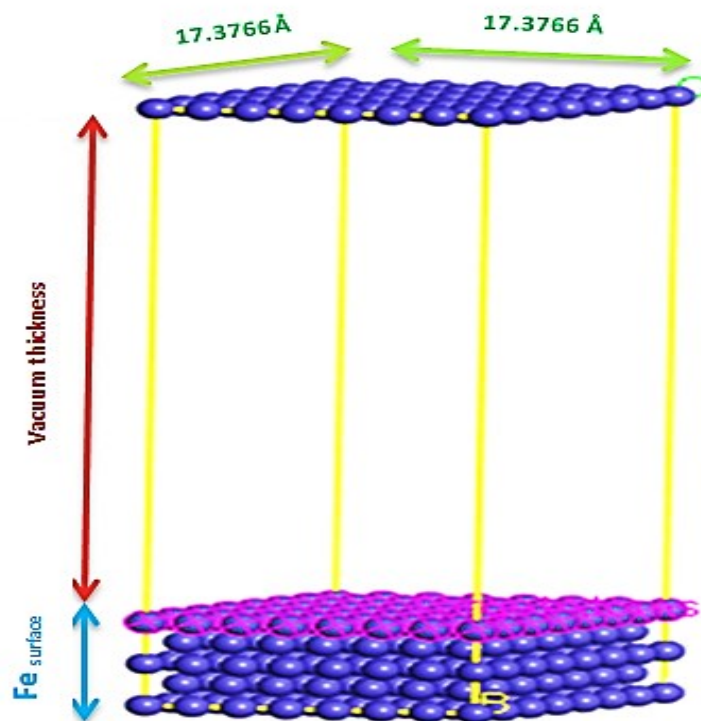

Figure 1A. Simulation box adopted in the Monte Carlo study.

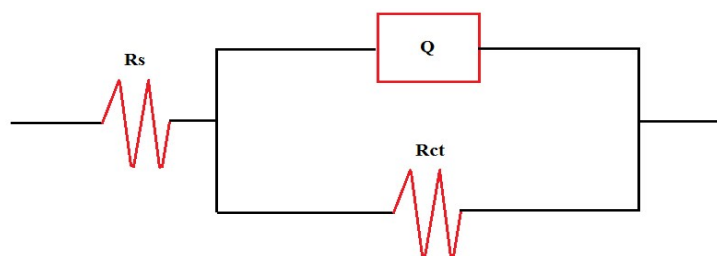

**Figure 2A.** Electrical equivalent circuit of the double layer model.

**Table A1.** Calculated quantum chemical parameters for the molecules in gaz phase (eV)

| gaz                           | ELUMO   | EHOMO    | ELUMO      | EHOMO(ev)  | $\Delta E$ | Energy     | Energie    | I          | A          | $\eta$     | $\chi$     | $\omega$   | $\varepsilon$ | $\Delta N$ |      |
|-------------------------------|---------|----------|------------|------------|------------|------------|------------|------------|------------|------------|------------|------------|---------------|------------|------|
| HF/6-31G+(2d,p)               |         |          |            |            |            |            |            |            |            |            |            |            |               |            |      |
| C1                            | 0,04231 | -0,34992 | 1,15131433 | 9,52181309 | 10,6731274 | 256,778786 | 6964,45694 | 9,52181309 | 1,15131433 | 5,33656371 | 4,18524938 | 1,64116024 | 0,60932502    | 0,02761614 | 72,7 |
| C2                            | 0,04292 | -0,33323 | 1,16791329 | 9,06765482 | 10,2355681 | 311,827036 | -8457,4976 | 9,06765482 | 1,16791329 | 5,11778406 | 3,94987077 | 1,52424164 | 0,65606396    | 0,05179285 | 84,1 |
| C3                            | 0,0434  | -0,32255 | 1,18097476 | 8,77703707 | 9,95801183 | 486,356087 | 13191,1443 | 8,77703707 | 1,18097476 | 4,97900592 | 3,79803116 | 1,44858641 | 0,69032816    | 0,06848444 | 88,2 |
| HF/6-31G++(2d,p)              |         |          |            |            |            |            |            |            |            |            |            |            |               |            |      |
| C1                            | 0,07062 | -0,34993 | 1,92166907 | -9,5220852 | 11,4437543 | 256,778856 | 6964,45885 | 9,5220852  | 1,92166907 | 5,72187714 | 3,80020807 | 1,26196185 | 0,79241698    | 0,05940288 | 72,7 |
| C2                            | 0,06992 | -0,33324 | 1,90262109 | 9,06792694 | 10,970548  | 311,827126 | 8457,50003 | 9,06792694 | 1,90262109 | 5,48527401 | 3,58265292 | 1,16998731 | 0,85471012    | 0,08179601 | 84,1 |
| C3                            | 0,06721 | -0,32256 | 1,82887819 | 8,77730918 | 10,6061874 | 486,356154 | 13191,1462 | 8,77730918 | 1,82887819 | 5,30309369 | 3,4742155  | 1,13803131 | 0,87871045    | 0,09482998 | 88,2 |
| MP <sub>2</sub> /6-31G+(2d,p) |         |          |            |            |            |            |            |            |            |            |            |            |               |            |      |
| C1                            | 0,09993 | 0,324236 | 2,7192352  | 8,82291549 | 11,5421507 | 257,623677 | 6987,37242 | 8,82291549 | -2,7192352 | 5,77107535 | 3,05184014 | 0,80693179 | 1,23926213    | 0,12373429 | 72,7 |
| C2                            | 0,11239 | -0,32351 | 3,05828925 | 8,80316001 | 11,8614493 | 312,850508 | 8485,25662 | 8,80316001 | 3,05828925 | 5,93072463 | 2,87243538 | 0,69560514 | 1,4375972     | 0,13552852 | 84,1 |
| C3                            | 0,10816 | -0,31241 | 2,94318502 | -          | 11,4442985 | -          | -          | 8,50111347 | -          | 5,72214925 | 2,77896423 | 0,67480258 | 1,4819149     | 0,14863609 | 88,2 |

|                                |         |          |            |            |            |            |            |            |            |            |            |            |            |            |      |
|--------------------------------|---------|----------|------------|------------|------------|------------|------------|------------|------------|------------|------------|------------|------------|------------|------|
|                                |         |          |            | 8,50111347 |            | 489,326547 | 13271,7103 |            | 2,94318502 |            |            |            |            |            |      |
| MP <sub>2</sub> /6-31G++(2d,p) |         |          |            |            |            |            |            |            |            |            |            |            |            |            |      |
| C1                             | 0,06423 | -0,27182 | 1,74778822 | 7,39660275 | 9,14439097 | 257,623841 | 6987,37685 | 7,39660275 | 1,74778822 | 4,57219549 | 2,82440726 | 0,87236825 | 1,14630489 | 0,18105008 | 72,7 |
| C2                             | 0,05471 | -0,24906 | 1,48873569 | 6,77727128 | 8,26600698 | 312,850801 | 8485,26457 | 6,77727128 | 1,48873569 | 4,13300349 | 2,6442678  | 0,84589236 | 1,18218351 | 0,2220821  | 84,1 |
| C3                             | 0,05612 | 0,243738 | 1,52710377 | 6,63245221 | 8,15955598 | 488,031289 | 13236,5798 | 6,63245221 | 1,52710377 | 4,07977799 | 2,55267422 | 0,79859072 | 1,25220589 | 0,23620474 | 88,2 |
| B3LYP/6-31G+(2d,p)             |         |          |            |            |            |            |            |            |            |            |            |            |            |            |      |
| C1                             | 0,06422 | -0,26182 | 1,74751611 | 7,12448875 | 8,87200486 | 258,272896 | 7004,98079 | 7,12448875 | 1,74751611 | 4,43600243 | 2,68848632 | 0,81469282 | 1,2274565  | 0,20192884 | 72,7 |
| C2                             | 0,05471 | -0,24806 | 1,48873569 | 6,75005988 | 8,23879558 | -313,64174 | 8506,71674 | 6,75005988 | 1,48873569 | 4,11939779 | 2,6306621  | 0,83997509 | 1,19051149 | 0,22446702 | 84,1 |
| C3                             | 0,05611 | -0,23738 | 1,52683165 | 6,45944213 | 7,98627379 | 489,353282 | 13272,4354 | 6,45944213 | 1,52683165 | 3,99313689 | 2,46630524 | 0,76163949 | 1,31295712 | 0,25214447 | 88,2 |
| B3LYP/6-31G++(2d,p)            |         |          |            |            |            |            | 0          |            |            |            |            |            |            |            |      |
| C1                             | 0,04644 | -0,24992 | 1,26369742 | 6,80067309 | 8,0643705  | 258,272976 | 7004,98296 | 6,80067309 | 1,26369742 | 4,03218525 | 2,76848784 | 0,95041825 | 1,05216835 | 0,21223134 | 72,7 |
| C2                             | 0,03585 | -0,23432 | 0,97552869 | 6,37617525 | 7,35170394 | 313,641872 | -8506,7203 | 6,37617525 | 0,97552869 | 3,67585197 | 2,70032328 | 0,99184432 | 1,00822274 | 0,24207677 | 84,1 |
| C3                             | 0,03653 | -0,22105 | 0,99403244 | 6,01507997 | 7,00911241 | 489,353382 | 13272,4382 | 6,01507997 | 0,99403244 | 3,50455621 | 2,51052376 | 0,89921936 | 1,1120757  | 0,28098797 | 88,2 |

**Table A2. Calculated quantum chemical parameters for the molecules in aqueous phase (eV)**

| aqu             | ELUMO    | EHOMO     | ELUMO      | EHOMO(ev)  | ΔE         | Energy     | Energie    | I          | A          | η          | χ          | ω          | ε          | ΔN         |      |
|-----------------|----------|-----------|------------|------------|------------|------------|------------|------------|------------|------------|------------|------------|------------|------------|------|
| HF/6-31G+(2d,p) |          |           |            |            |            |            |            |            |            |            |            |            |            |            |      |
| C1              | 0,032806 | 0,3064941 | 0,89269719 | 8,34013355 | 9,23283074 | 256,778786 | 6964,45694 | 8,34013355 | 0,89269719 | 4,61641537 | 3,72371818 | 1,50182295 | 0,66585745 | 0,08191224 | 72,7 |
| C2              | 0,03249  | -0,302194 | 0,88409839 | 8,22312181 | 9,1072202  | 311,827036 | -8457,4976 | 8,22312181 | 0,88409839 | 4,5536101  | 3,66951171 | 1,47853197 | 0,67634655 | 0,08899404 | 84,1 |
| C3              | 0,03491  | -0,303246 | 0,94994997 | -8,2517482 | 9,20169818 | 486,356087 | 13191,1443 | 8,2517482  | 0,94994997 | 4,60084909 | 3,65089912 | 1,44854396 | 0,69034839 | 0,09010303 | 88,2 |

|                                |          |           |            |            |            |            |            |            |            |            |            |            |            |            |      |
|--------------------------------|----------|-----------|------------|------------|------------|------------|------------|------------|------------|------------|------------|------------|------------|------------|------|
| HF/6-31G++(2d,p)               |          |           |            |            |            |            |            |            |            |            |            |            |            |            |      |
| <b>C1</b>                      | 0,05996  | -0,313245 | 1,92166907 | -9,5220852 | 11,4437543 | 256,778856 | 6964,45885 | 9,5220852  | 1,92166907 | 5,72187714 | 3,80020807 | 1,26196185 | 0,79241698 | 0,05940288 | 72,7 |
| <b>C2</b>                      | 0,05472  | -0,302194 | 1,90262109 | 9,06792694 | 10,970548  | 311,827126 | 8457,50003 | 9,06792694 | 1,90262109 | 5,48527401 | 3,58265292 | 1,16998731 | 0,85471012 | 0,08179601 | 84,1 |
| <b>C3</b>                      | 0,06681  | 0,3054942 | 1,82887819 | 8,77730918 | 10,6061874 | 486,356154 | 13191,1462 | 8,77730918 | 1,82887819 | 5,30309369 | 3,4742155  | 1,13803131 | 0,87871045 | 0,09482998 | 88,2 |
| MP <sub>2</sub> /6-31G+(2d,p)  |          |           |            |            |            |            |            |            |            |            |            |            |            |            |      |
| <b>C1</b>                      | 0,10402  | -0,31402  | 2,83052983 | 8,54492383 | 11,3754537 | 257,623677 | 6987,37242 | 8,54492383 | 2,83052983 | 5,68772683 | 2,857197   | 0,71764828 | 1,39344026 | 0,14265831 | 72,7 |
| <b>C2</b>                      | 0,179605 | -0,34409  | 4,8873035  | 9,36317063 | 14,2504741 | 312,850508 | 8485,25662 | 9,36317063 | -4,8873035 | 7,12523706 | 2,23793356 | 0,35145123 | 2,84534501 | 0,15733276 | 84,1 |
| <b>C3</b>                      | 0,1763   | -0,3252   | 4,79736982 | 8,84914728 | 13,6465171 | 489,326547 | 13271,7103 | 8,84914728 | 4,79736982 | 6,82325855 | 2,02588873 | 0,30075257 | 3,32499232 | 0,17983426 | 88,2 |
| MP <sub>2</sub> /6-31G++(2d,p) |          |           |            |            |            |            |            |            |            |            |            |            |            |            |      |
| <b>C1</b>                      | 0,06673  | 0,2557129 | 1,81581672 | 6,95830601 | 8,77412273 | 257,623841 | 6987,37685 | 6,95830601 | 1,81581672 | 4,38706136 | 2,57124464 | 0,75349972 | 1,32714051 | 0,21754373 | 72,7 |
| <b>C2</b>                      | 0,05827  | -0,24845  | 1,58560828 | 6,76067233 | 8,34628061 | 312,850801 | 8485,26457 | 6,76067233 | 1,58560828 | 4,1731403  | 2,58753203 | 0,80219229 | 1,2465839  | 0,22674387 | 84,1 |
| <b>C3</b>                      | 0,05923  | -0,23633  | 1,61173122 | 6,43087016 | 8,04260138 | 488,031289 | 13236,5798 | 6,43087016 | 1,61173122 | 4,02130069 | 2,40956947 | 0,72190884 | 1,38521645 | 0,25743294 | 88,2 |
| B3LYP/6-31G+(2d,p)             |          |           |            |            |            |            |            |            |            |            |            |            |            |            |      |
| <b>C1</b>                      | 0,04975  | -0,246125 | 1,35376715 | 6,69740583 | 8,05117298 | 258,272896 | 7004,98079 | 6,69740583 | 1,35376715 | 4,02558649 | 2,67181934 | 0,88665572 | 1,12783347 | 0,22458599 | 72,7 |
| <b>C2</b>                      | 0,04024  | -0,23513  | 1,09498674 | 6,39821648 | 7,49320322 | -313,64174 | 8506,71674 | 6,39821648 | 1,09498674 | 3,74660161 | 2,65161487 | 0,9383252  | 1,06572859 | 0,24400581 | 84,1 |
| <b>C3</b>                      | 0,04081  | -0,22151  | 1,11049723 | 6,02759721 | 7,13809445 | 489,353282 | 13272,4354 | 6,02759721 | 1,11049723 | 3,56904722 | 2,45854999 | 0,84679015 | 1,18093013 | 0,28319183 | 88,2 |
| B3LYP/6-31G++(2d,p)            |          |           |            |            |            |            | 0          |            |            |            |            |            |            |            |      |
| <b>C1</b>                      | 0,059826 | 0,2436844 | 1,62794922 | 6,63099368 | 8,2589429  | 258,272976 | 7004,98296 | 6,63099368 | 1,62794922 | 4,12947145 | 2,50152223 | 0,75767729 | 1,31982311 | 0,23955581 | 72,7 |
| <b>C2</b>                      | 0,0592   | -0,23632  | 1,61091488 | 6,43059805 | 8,04151293 | 313,641872 | -8506,7203 | 6,43059805 | 1,61091488 | 4,02075646 | 2,40984158 | 0,72216964 | 1,38471621 | 0,25743395 | 84,1 |
| <b>C3</b>                      | 0,6671   | -0,27128  | 18,1527249 | 7,38190859 | 25,5346335 | 489,353382 | 13272,4382 | 7,38190859 | 18,1527249 | 12,7673168 | 5,38540817 | 1,13581506 | 0,88042503 | 0,38635401 | 88,2 |

**Table 3A. Mulliken charge distribution for the molecules calculated at the B3LYP/6-31G++(2d, p) in gas and aqueous phases.**

| Atom | C1  | C2        | C3       | C4       | C5       | C6       | C10      | O11      | O12       | O14      | O16      |          |
|------|-----|-----------|----------|----------|----------|----------|----------|----------|-----------|----------|----------|----------|
| C1   | gas | -0.09110  | -        | -        | -        | -        | -        | -        | -         | -        | -        |          |
|      | aq  | -0.10093  | 0.085454 | 0.173841 | 0.174220 | 0.171249 | 0.081242 | 0.406797 | 0.378627  | 0.408691 | -        |          |
| C2   | gas | 0.37222   | -        | -        | 0.155045 | -        | -        | -        | -0.379705 | -        | -        |          |
|      | aq  | 0.378340  | 0.097685 | 0.182301 | 0.174314 | 0.181060 | 0.093672 | 0.408368 | -0.409812 | -        | -        |          |
| C3   | gas | -0.107261 | -        | -        | -        | -        | -        | -        | -         | -        | -        |          |
|      | aq  | -0.056133 | 0.169179 | 0.167000 | -        | 0.164094 | 0.165285 | 0.411120 | 0.410034  | 0.515089 | -        |          |
| C3   | gas | -0.107261 | 0.178138 | 0.175422 | 0.156103 | 0.173661 | 0.174062 | 0.412745 | 0.410723  | 0.412260 | 0.536031 |          |
|      | aq  | -0.056133 | 0.201193 | -        | -        | -        | -        | -        | -0.348481 | -        | -        |          |
| C3   | gas | -0.107261 | 0.192333 | 0.149921 | 0.291486 | 0.723088 | 0.336202 | 0.429496 | -0.407392 | 0.444866 | 0.524060 | 0.531439 |
|      | aq  | -0.056133 | 0.201193 | -        | -        | -        | -        | -        | -0.407392 | -        | -        | -        |
| C3   | gas | -0.107261 | 0.192333 | 0.149921 | 0.291486 | 0.723088 | 0.336202 | 0.429496 | -0.407392 | 0.444866 | 0.524060 | 0.531439 |
|      | aq  | -0.056133 | 0.201193 | 0.157283 | 0.321261 | 0.739296 | 0.287849 | 0.469892 | 0.453940  | 0.569537 | 0.575114 |          |
